# Supplementary material for: The Effect of Gastric Bypass on the Pharmacokinetics of Serotonin Reuptake Inhibitors
Source: Atypon-hosted journal article supplement (doi:10.1176/appi.ajp.2011.11050719), 2012-03-01
Supplement: appi.ajp.2011.11050719_ds001.pdf [file appi.ajp.2011.11050719_ds001.pdf]

**TABLE S1. Demographic Characteristics, Dose-Corrected Pharmacokinetics Data, SIGH-ADS Scores, and Weight Loss Data for 12 Patients Before and After Roux-en-Y Gastric Bypass Surgery<sup>a</sup>**

| Patient ID | Age - Gender | Psychiatric Diagnosis                           | Drug        | Visit | AUC (hr/L)         | t <sub>max</sub> (hr) | C <sub>max</sub> (L/L) | SIGH-ADS | BMI  | %EWL |
|------------|--------------|-------------------------------------------------|-------------|-------|--------------------|-----------------------|------------------------|----------|------|------|
| 1          | 33-F         | MDD, recurrent, moderate                        | venlafaxine | Pre   | 0.0061             | 4.05                  | 0.0012                 | 17       | 51.9 |      |
|            |              |                                                 | venlafaxine | 1m    | 0.0087             | 5.00                  | 0.0015                 | 15       | 47.3 | 14.7 |
|            |              |                                                 | venlafaxine | 6m    | N/A                | N/A                   | N/A                    | N/A      | 38.8 | 42.0 |
|            |              |                                                 | venlafaxine | 12m   | 0.0047             | 6.25                  | 0.0009                 | 15       | 37.4 | 27.9 |
| 2          | 31-F         | Bipolar I disorder, most recent depressed, mild | venlafaxine | Pre   | 0.0066             | 2.00                  | 0.0012                 | 18       | 54.3 |      |
|            |              |                                                 | venlafaxine | 1m    | 0.0024             | 2.50                  | 0.0005                 | 16       | 48.3 | 17.9 |
|            |              |                                                 | venlafaxine | 6m    | 0.0025             | 3.00                  | 0.0005                 | 20       | 40.8 | 40.4 |
|            |              |                                                 | venlafaxine | 12m   | 0.0027             | 5.33                  | 0.0005                 | 25       | 40.1 | 42.6 |
| 3          | 23-F         | MDD, moderate, in partial remission             | venlafaxine | Pre   | 0.0079             | 3.25                  | 0.0017                 | 12       | 56.4 |      |
|            |              |                                                 | venlafaxine | 1m    | 0.0127             | 1.62                  | 0.0035                 | 15       | 54.4 | 5.4  |
|            |              |                                                 | venlafaxine | 6m    | 0.0105             | 3.33                  | 0.0024                 | 17       | 43.9 | 35.3 |
|            |              |                                                 | venlafaxine | 12m   | 0.0129             | 1.50                  | 0.0031                 | 5        | 40.6 | 44.4 |
| 4          | 56-F         | MDD, recurrent, sustained full remission        | venlafaxine | Pre   | 0.003 <sup>b</sup> | 5.00                  | 0.0006                 | 7        | 56.7 |      |
|            |              |                                                 | venlafaxine | 1m    | 0.0024             | 6.50                  | 0.0005                 | 6        | 52.3 | 12.3 |
|            |              |                                                 | venlafaxine | 6m    | 0.0058             | 2.83                  | 0.0012                 | 6        | 44.5 | 34.1 |
|            |              |                                                 | venlafaxine | 12m   | 0.005              | 5.75                  | 0.0009                 | 9        | 41.6 | 42.3 |
| 5          | 43-F         | Anxiety disorder NOS                            | venlafaxine | Pre   | 0.0059             | 4.00                  | 0.001                  | 10       | 47.2 |      |
|            |              |                                                 | venlafaxine | 1m    | 0.0046             | 6.00                  | 0.0008                 | 9        | 42.2 | 20.1 |
|            |              |                                                 | venlafaxine | 6m    | 0.006              | 6.00                  | 0.0011                 | 2        | 34.3 | 49.6 |
|            |              |                                                 | venlafaxine | 12m   | 0.0173             | 0.50                  | 0.0044                 | 3        | 29.7 | 67.1 |
| 6          | 22-F         | MDD, single episode, mild                       | citalopram  | Pre   | 0.0169             | 2.00                  | 0.0032                 | 11       | 41.1 |      |
|            |              |                                                 | citalopram  | 1m    | 0.0109             | 6.25                  | 0.002                  | 15       | 36.3 | 23.0 |
|            |              |                                                 | citalopram  | 6m    | 0.0145             | 1.67                  | 0.003                  | 12       | 27.1 | 69.1 |
|            |              |                                                 | citalopram  | 12m   | 0.0189             | 1.08                  | 0.0035                 | 5        | 24.8 | 80.3 |

(Continued)

**TABLE S1 Continued**

| Patient ID | Age - Gender | Psychiatric Diagnosis                                        | Drug         | Visit | AUC (hr/L) | t <sub>max</sub> (hr) | C <sub>max</sub> (L/L) | SIGH-ADS | BMI  | %EWL |
|------------|--------------|--------------------------------------------------------------|--------------|-------|------------|-----------------------|------------------------|----------|------|------|
| 7          | 36-F         | Dysthymic disorder                                           | citalopram   | Pre   | 0.0112     | 2.63                  | 0.0019                 | 17       | 51.2 |      |
|            |              |                                                              | citalopram   | 1m    | 0.0044     | 2.50                  | 0.0008                 | 18       | 46.3 | 14.8 |
|            |              |                                                              | citalopram   | 6m    | 0.0227     | 3.50                  | 0.0035                 | 7        | 41.4 | 31.4 |
|            |              |                                                              | citalopram   | 12m   | 0.023      | 2.50                  | 0.0041                 | 3        | 41.7 | 30.2 |
| 8          | 54-F         | MDD, recurrent, moderate, in full remission                  | escitalopram | Pre   | 0.0211     | 2.92                  | 0.0035                 | 5        | 51.2 |      |
|            |              |                                                              | escitalopram | 1m    | 0.0232     | 2.00                  | 0.0039                 | 6        | 45.7 | 18.3 |
|            |              |                                                              | escitalopram | 6m    | 0.0214     | 1.92                  | 0.0039                 | N/A      | 37.7 | 44.7 |
|            |              |                                                              | escitalopram | 12m   | N/A        | N/A                   | N/A                    | 2        | 34.6 | 54.8 |
| 9          | 52-F         | Bipolar II disorder, most recent episode depressed, moderate | escitalopram | Pre   | 0.0289     | 5.00                  | 0.0047                 | 25       | 45.5 |      |
|            |              |                                                              | escitalopram | 1m    | 0.0124     | 3.00                  | 0.002                  | 18       | 40.4 | 20.9 |
|            |              |                                                              | escitalopram | 6m    | 0.0224     | 1.17                  | 0.0038                 | 31       | 33.7 | 48.0 |
|            |              |                                                              | escitalopram | 12m   | 0.0369     | 1.00                  | 0.0068                 | 14       | 36.1 | 38.3 |
| 10         | 47-F         | MDD, recurrent, in full remission                            | sertraline   | pre   | 0.0022     | 5.08                  | 0.0004                 | 6        | 46.1 |      |
|            |              |                                                              | sertraline   | 1m    | 0.0008     | 4.08                  | 0.0001                 | 5        | 40.6 | 21.9 |
|            |              |                                                              | sertraline   | 6m    | N/A        | N/A                   | N/A                    | N/A      | N/A  |      |
|            |              |                                                              | sertraline   | 12m   | N/A        | N/A                   | N/A                    | 4        | 28.2 | 71   |
| 11         | 52-F         | Bipolar II, most recent episode depressed                    | sertraline   | Pre   | 0.0069     | 2.42                  | 0.0011                 | 5        | 37.4 |      |
|            |              |                                                              | sertraline   | 1m    | 0.0036     | 5.33                  | 0.0006                 | 4        | 32.7 | 28.0 |
|            |              |                                                              | sertraline   | 6m    | 0.007      | 3.00                  | 0.0012                 | 8        | 30.9 | 38.9 |
|            |              |                                                              | sertraline   | 12m   | 0.0094     | 2.50                  | 0.0015                 | 3        | 29.9 | 45.1 |
| 12         | 54-M         | Generalized anxiety disorder                                 | duloxetine   | Pre   | 0.0171     | 1.33                  | 0.0033                 | 15       | 47.4 |      |
|            |              |                                                              | duloxetine   | 1m    | 0.0164     | 5.00                  | 0.0032                 | 16       | 42.0 | 20.9 |
|            |              |                                                              | duloxetine   | 6m    | 0.0076     | 3.25                  | 0.0017                 | 16       | 37.9 | 37.5 |
|            |              |                                                              | duloxetine   | 12m   | 0.0034     | 3.00                  | 0.0008                 | 8        | 36.8 | 42.1 |

<sup>a</sup> MDD=major depressive disorder; NOS=not otherwise specified; Pre=preoperative; m=month; AUC=area under the concentration/time curve from 0 to 7 hours (AUC<sub>0-7</sub>); t<sub>MAX</sub>=time to C<sub>MAX</sub>; C<sub>MAX</sub>=maximum concentration; BMI=body mass index; %EWL=percent excess weight loss; N/A=not available; SIGH-ADS=Structured Interview Guide for the Hamilton Depression Rating Scale–Atypical Depression Symptom Version.

<sup>b</sup> For patient 4, the preoperative AUC<sub>0-6</sub> is listed. The final blood sample was drawn at 6.0 hours, so a preoperative AUC<sub>0-7</sub> could not be calculated.
